# Supplementary material for: A Pattern-Based Development Approach for Interaction Flow Modeling Language
Source: Hindawi journal article supplement (doi:10.1155/2019/7904353), 2019-04-14
Supplement: f1 [file 7904353.f1.xlsx]

## Sheet: Sheet 1 
	Information related to tables 5 and 6 of the paper
	Table 1. Developer time (secs.) for the manual specification of each type of entity by each developer
	Developer	Time for link	Time for units	Time for binding
	1	22	107	64
	2	23	115	62
	3	22	106	61
	4	26	117	65
	5	27	116	67
	6	24	113	68
	7	24	118	69
	8	25	107	68
	9	24	110	70
	10	23	111	66
	Mean	24	112	66
	Variance	2.4	17.8	8
	Standard deviation	1.54919	4.219	2.82843
	Table 2. Developer time (secs.) for the specification of every considered case							Table 3. Mean of develper time for manually specifying each operation
	Type	Entities not related						Average time need by hand designed (seconds)	by operation (Entities not related)
		Nº of clics *	Nº of links	Nº de units	Nº of couplings/bindings	Time need handmade (seconds) *		Type	Seconds
	All in one	0	16	19	6	2908		Clic	1
	Create	0	3	4	1	586		Link	24
	Read	0	1	3	1	426		Unit	112
	Update	0	5	6	3	990		Coupling/binding	66
	Delete	0	3	4	1	586
		0	28	36	12	5496
	Type	1toN Relations						Average time need by hand designed (seconds)	by operation (1toN Relations / NtoM Relations)
		Nº of clics *	Nº of links	Nº de units	Nº of couplings/bindings	Time need handmade (seconds) *		Type	Seconds
	All in one	0	19	16	9	2842		Clic *	1
	Create	0	4	5	2	788		Link	4
	Read	0	1	3	1	426		Unit	25
	Update	0	6	7	4	426		Coupling/binding	10
	Delete	0	3	4	1	1192
		0	33	35	17	5674
	Type	NtoM Relations
		Nº of clics *	Nº of links	Nº de units	Nº of couplings/bindings	Time need handmade (seconds) *
	All in one	0	27	18	13	3522
	Create	0	7	5	3	926
	Read	0	1	3	1	426
	Update	0	13	10	7	1894
	Delete	0	3	4	1	586
		0	51	40	25	7354
	Type	Total number of entities
		Nº of clics *	Nº of links	Nº de units	Nº of couplings/bindings	Time need handmade (seconds) *
	All in one	0	62	53	28	9272
	Create	0	14	14	6	2300
	Read	0	3	9	3	1278
	Update	0	24	23	14	4076
	Delete	0	9	12	3	1758
		0	112	111	54	18684

## Sheet: Sheet 2
	Information needed for table 7 of the paper
		Table 1. Data for table 7 (row 2) in the paper. Results of the 6 projects under evaluation
	Projects	1	Entities not related					1toN Relations CRUD					NtoM Relations CRUD						Nº of entities
			AllIn1	Create	Read	Update	Delete	AllIn1	Create	Read	Update	Delete	AllIn1	Create	Read	Update	Delete
	P1	Very large project with high number of CRUD operations	116	115	107	116	112	97	97	94	92	95	83	26	42	42	24		267
	P2	Medium project with medium number of CRUD operations	9	8	9	7	7	10	5	7	4	6	7	6	8	9	6		84
	P3	Medium project with low number of CRUD operations	5	5	4	5	5	4	4	4	4	3	6	3	2	6	3		36
	P4	Medium project with low number of CRUD operations	3	3	3	4	5	4	4	3	3	3	5	4	2	4	3		27
	P5	Little project with low number of CRUD operations	2	2	1	2	1	2	2	2	2	1	4	3	2	3	1		14
	P6	Little project with low number of CRUD operations	2	2	1	1	1	2	1	1	1	1	2	3	2	2	1		10
		Table 2. Data for computing row 9 of Table 7 in the paper. Developer time (secs.) for the specification of every considered case in AutoCRUD
		AutoCRUD time (secs)	2	1	1	1	1	3	2	1	2	1	5	3	1	3	1

## Sheet: Sheet 3
	Information needed for table 7 of the paper
	Table 1. Data for table 7 (row 7) in the paper. Results of the 6 projects under evaluation
	Without using AutoCRUD
			Business Logic (CRUD units) (Entities not related)					Business Logic (CRUD units) (Entities 1toN)					Business Logic (CRUD units) (Entities NtoM)					TOTAL
	Project	Size	Nº of clics	Nº of links	Nº of untis	Nº of bindings	Time (secs)	Nº of clics	Nº of links	Nº of untis	Nº of bindings	Time (secs)	Nº of clics	Nº of links	Nº of untis	Nº of bindings	Time (secs)	Nº of clics	Nº of links	Nº of untis	Nº of bindings	Time (secs)
	P1	Very large project with high number of CRUD operations	0	3224	4129	1378	630772	0	3162	3343	1624	544586	0	4873	3813	2385	701418	0	11259	11285	5387	1876776
	P2	Medium project with medium number of CRUD operations	0	233	300	99	45726	0	259	258	129	44198	0	382	290	186	53924	0	874	848	414	143848
	P3	Medium project with low number of CRUD operations	0	182	241	84	27054	0	129	136	67	21504	0	201	156	99	28830	0	512	533	250	77388
	P4	Medium project with low number of CRUD operations	0	95	122	41	18650	0	122	126	62	20652	0	187	143	91	26510	0	404	391	194	65812
	P5	Little project with low number of CRUD operations	0	62	80	26	9980	0	63	66	33	10156	0	99	76	49	14122	0	224	222	108	34258
	P6	Little project with low number of CRUD operations	0	47	59	45	8990	0	52	51	26	8516	0	78	58	38	10876	0	177	168	109	28382
	Table 2. Data for table 7 (row 9) in the paper. Results of the 6 projects under evaluation
	Using AutoCRUD
			Business Logic (CRUD units) (Entities not related)					Business Logic (CRUD units) (Entities 1toN)					Business Logic (CRUD units) (Entities NtoM)					TOTAL
	Project	Size	Nº of clics	Nº of links	Nº of untis	Nº of bindings	Time (secs)	Nº of clics	Nº of links	Nº of untis	Nº of bindings	Time (secs)	Nº of clics	Nº of links	Nº of untis	Nº of bindings	Time (secs)	Nº of clics	Nº of links	Nº of untis	Nº of bindings	Time (secs)
	P1	Very large project with high number of CRUD operations					682					858					685					2225
	P2	Medium project with medium number of CRUD operations					468					597					305					1370
	P3	Medium project with low number of CRUD operations					460					579					300					1339
	P4	Medium project with low number of CRUD operations					456					579					295					1330
	P5	Little project with low number of CRUD operations					454					573					290					1317
	P6	Little project with low number of CRUD operations					454					573					280					1307

## Sheet: Sheet 4
	Information needed for table 7 and Figure 11 of the paper
	Table 1. Data for table 7 (rows 6 to 10) in the paper. Results of the 6 projects under evaluation
				Without using AutoCRUD		Using AutoCRUD
	Project	Size	Cost (hours)	Cost without AutoCRUD (hours)	% CRUD time used (respect to the whole project)	Cost with AutoCRUD (hours)	CRUD profit ratio (%)	CRUD profit (hours) using atuoCRUD	Kind of project
	P1	Big	5380	521.322	9.69	0.618056	0.998814	520.704	Very large project with high number of CRUD operations
	P2	Medium	650	39.975	6.15	0.380556	0.99048	39.5944	Medium project with medium number of CRUD operations
	P3	Medium	350	21.525	6.15	0.371944	0.98272	21.1531	Medium project with low number of CRUD operations
	P4	Medium	230	14.145	6.15	0.369444	0.973882	13.7756	Medium project with low number of CRUD operations
	P5	Little	125	5.4	4.32	0.365833	0.932253	5.03417	Little project with low number of CRUD operations
	P6	Little	80	3.456	4.32	0.363056	0.894949	3.09294	Little project with low number of CRUD operations
	Table 2. Data for table 7 (row 8) and Figure 11 of the paper. Results of the 6 projects under evaluation
	Projects						Very large project with high number of CRUD operations				Medium project with medium number of CRUD operations				Medium project with low number of CRUD operations				Medium project with low number of CRUD operations				Little project with low number of CRUD operations				Little project with low number of CRUD operations
	Average cost time for developtment phase							Segmented IFML	Total hours	Business logic P1		Segmented IFML	Total hours	Business logic P2		Segmented IFML	Total hours	Business logic P3		Segmented IFML	Total hours	Business logic P4		Segmented IFML	Total hours	Business logic P5		Segmented IFML	Total hours	Business logic P6
	Data Base design						0.17		914.6		0.14		91		0.14		49		0.14		32.2		0.08		10		0.08		6.4
	Business logic design (IFML)						0.51	1	2743.8		0.41	1	266.5		0.41	1	143.5		0.41	1	94.3		0.36	1	45		0.36	1	28.8
	- CRUDs							0.19		521.322		0.15		39.975		0.15		21.525		0.15		14.145		0.12		5.4		0.12		3.456
	- Other Business Logic operations							0.46		1262.15		0.54		143.91		0.54		77.49		0.54		50.922		0.62		27.9		0.62		17.856
	- Scripts design							0.35		960.33		0.31		82.615		0.31		44.485		0.31		29.233		0.26		11.7		0.26		7.488
	Presentation and personalisation						0.32		1721.6		0.45		292.5		0.45		157.5		0.45		103.5		0.56		70		0.56		44.8
						TOTAL project time	1		5380		1		650		1		350		1		230		1		125		1		80
						Ratio respect to BL		0.0969				0.0615				0.0615				0.0615				0.0432				0.0432
